# Supplementary material
Source: Springer Nature journal article supplement (https://www.springermedizin.de/resource/supplementary/12955_2013_1198_MOESM2_ESM.pdf/9559024)

# CCQ Score

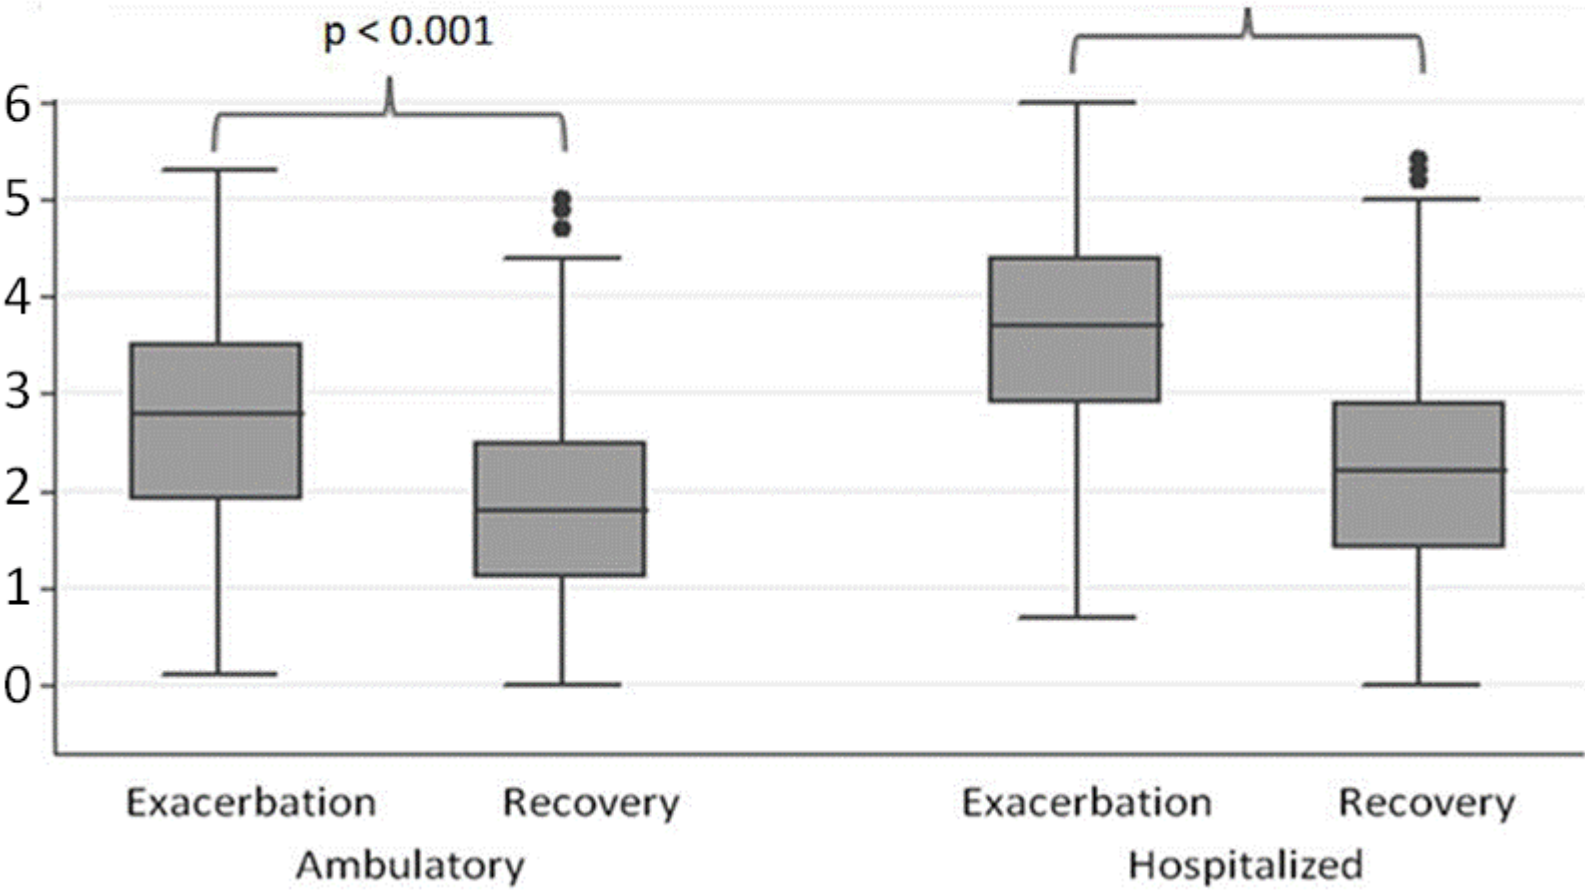

Supplement: MOESM2 [file 9559024]
